# Supplementary material for: Differential Chemical Profile of Metabolite Extracts Produced by the Diaporthe citri (G-01) Endophyte Mediated by Varying the Fermented Broth pH
Source: MDPI journal article supplement (doi:10.3390/metabo12080692), 2022-07-26
Supplement: s1 [file s1]

# Differential Chemical Profile of Metabolite Extracts Produced by the *Diaporthe citri* (G-01) Endophyte Mediated by Varying the Fermented Broth pH

- Supplementary material -

## Normalization and multivariate statistic approaches.

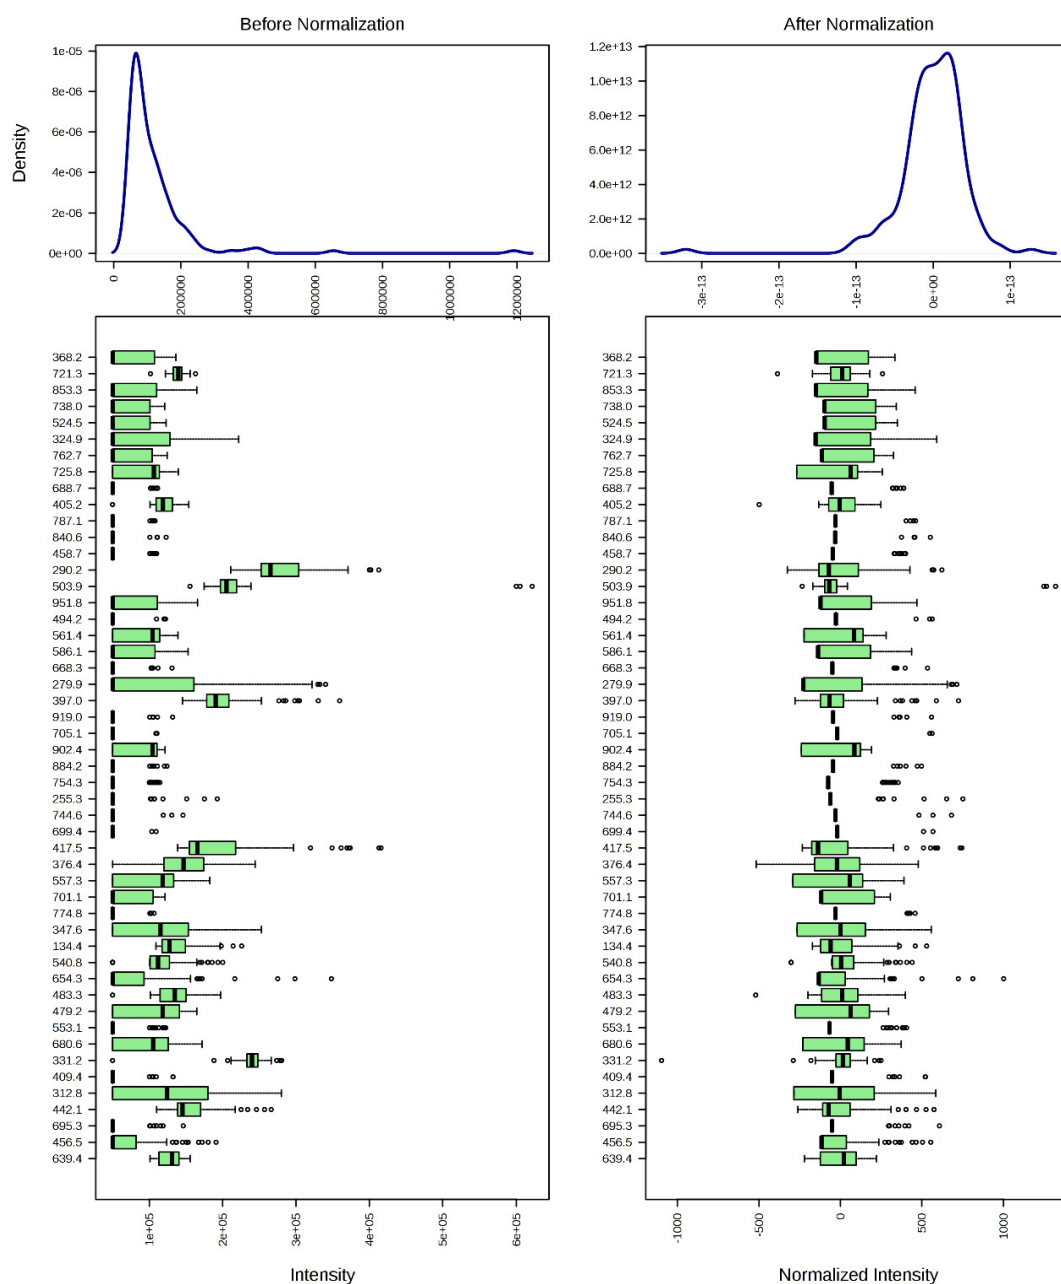

Figure S1. Pareto scaling normalization of the features acquired in positive mode.

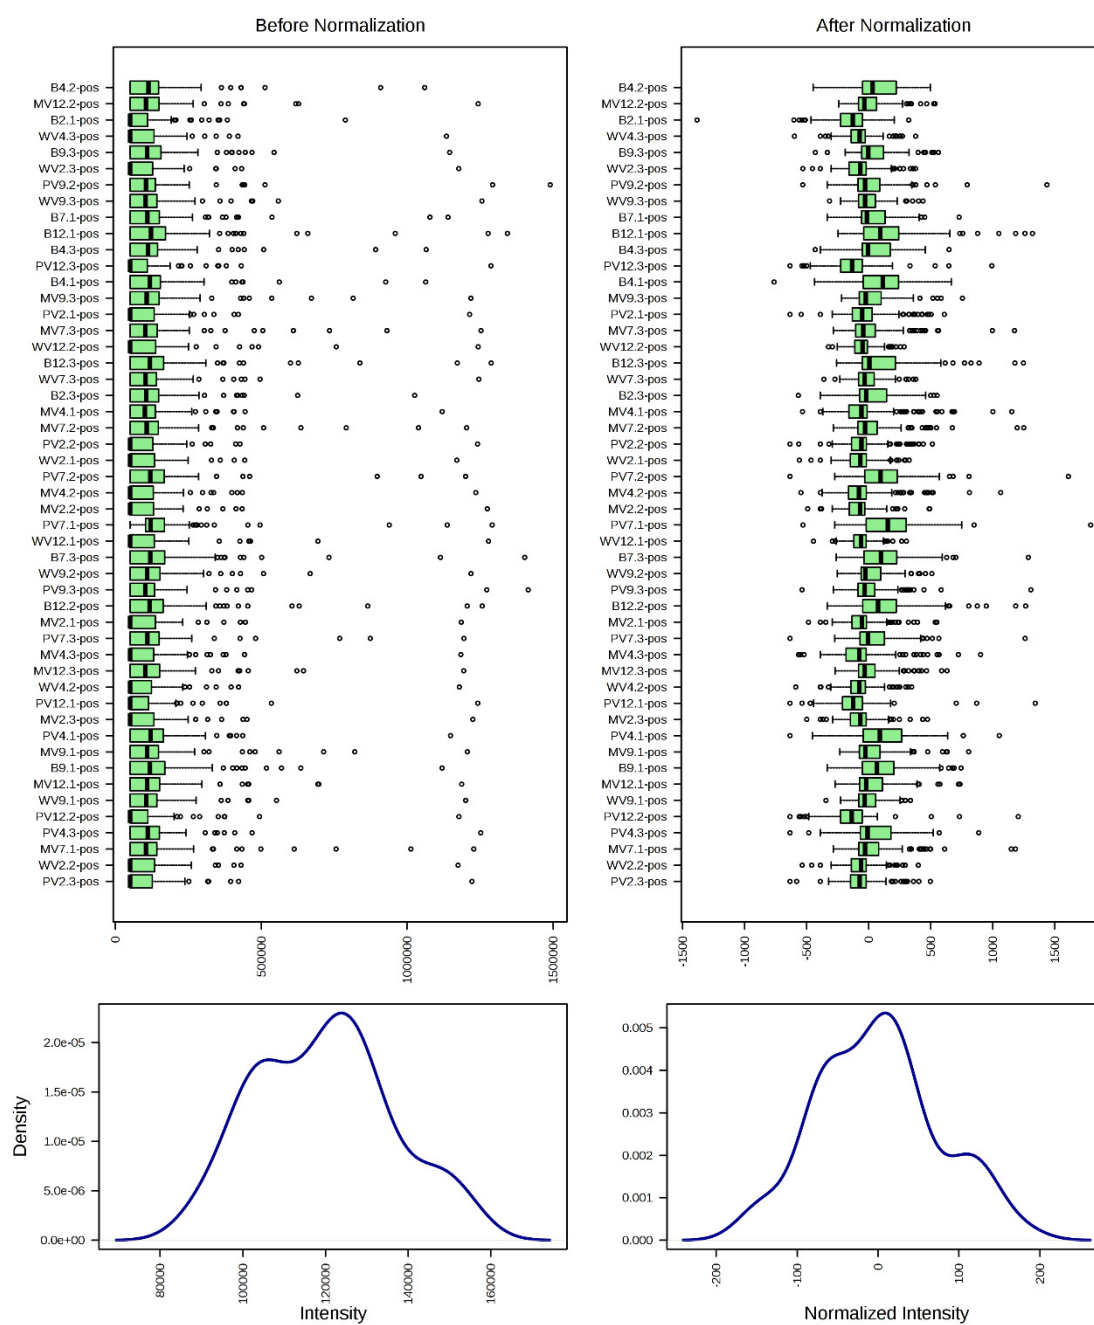

**Figure S2.** Pareto scaling normalization of samples acquired in positive mode.

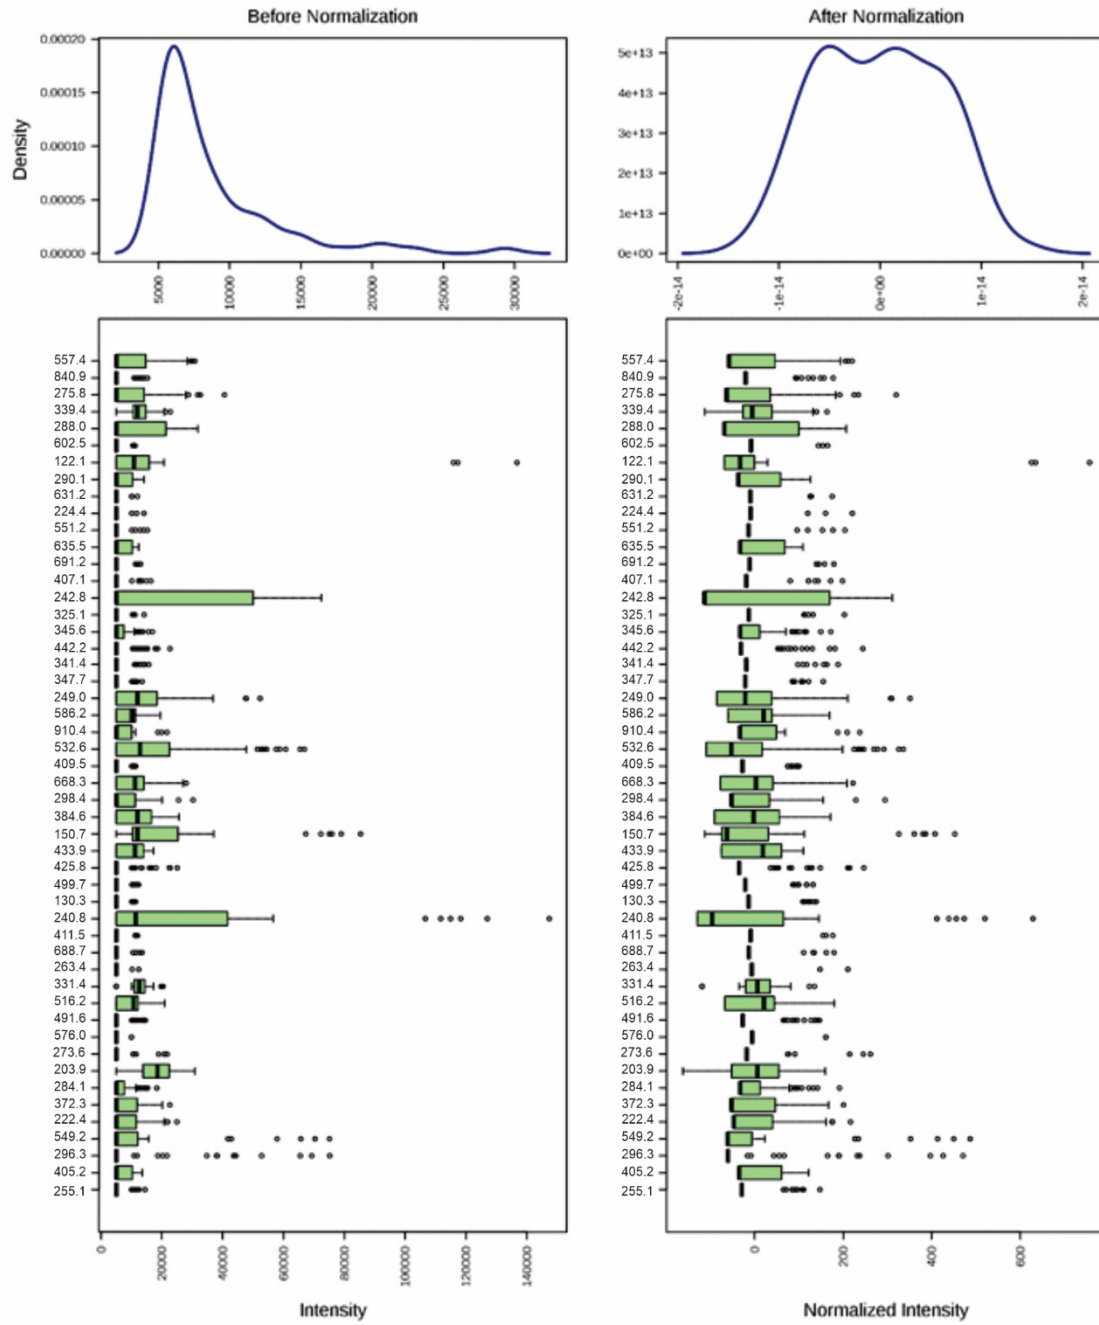

**Figure S3.** Pareto scaling normalization of features acquired in negative mode.

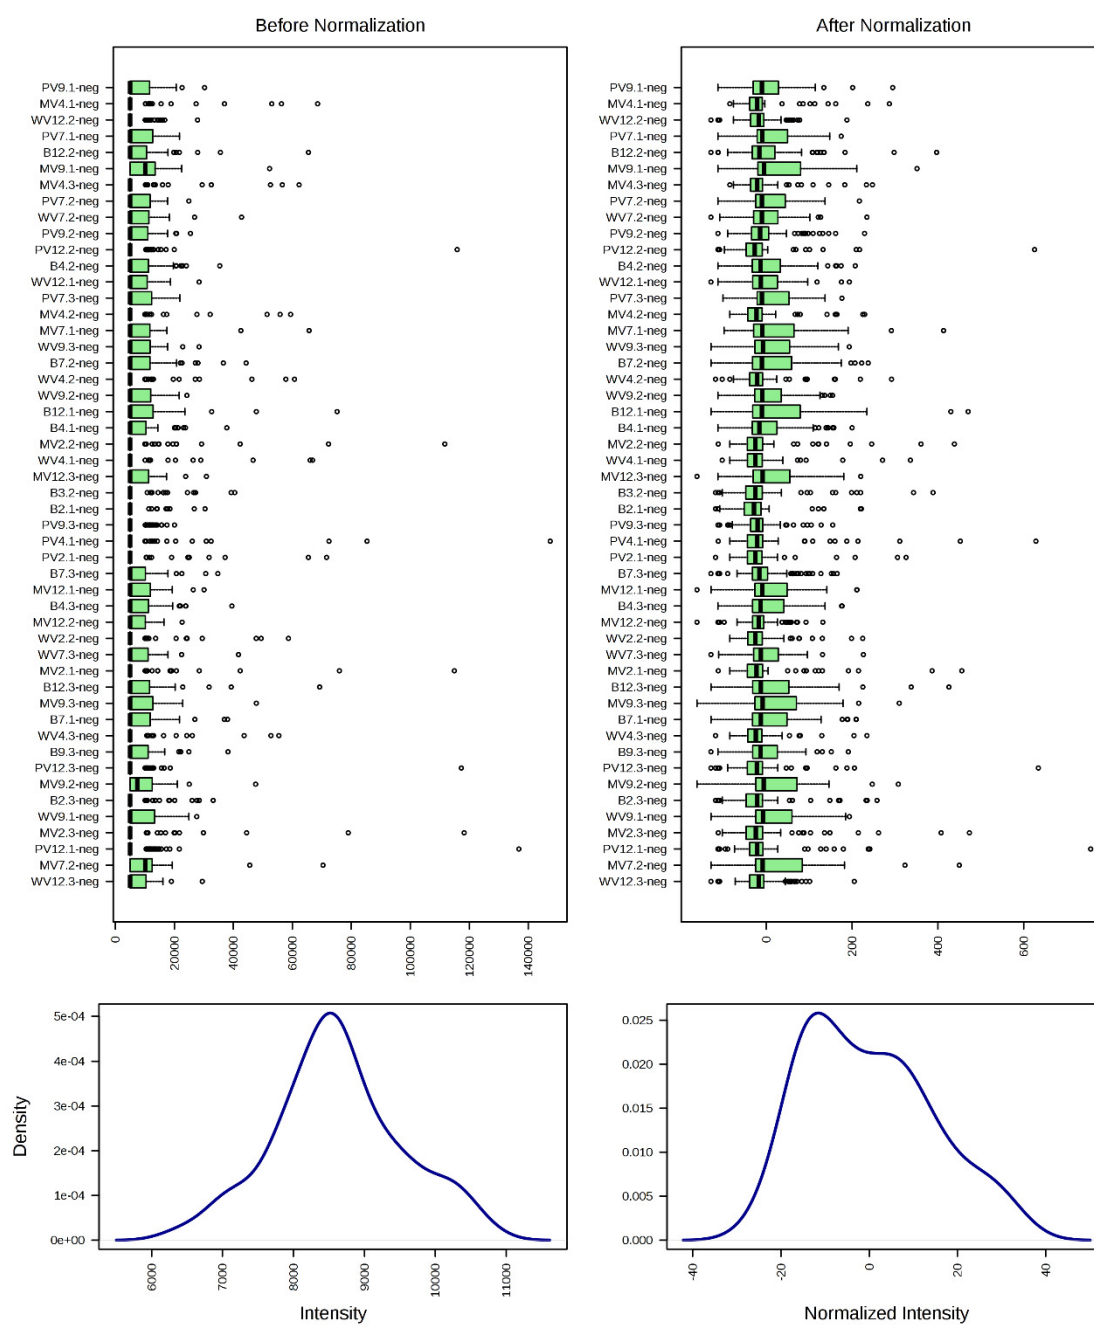

**Figure S4.** Pareto scaling normalization of samples acquired in negative mode.

## Results of Multivariate analyses

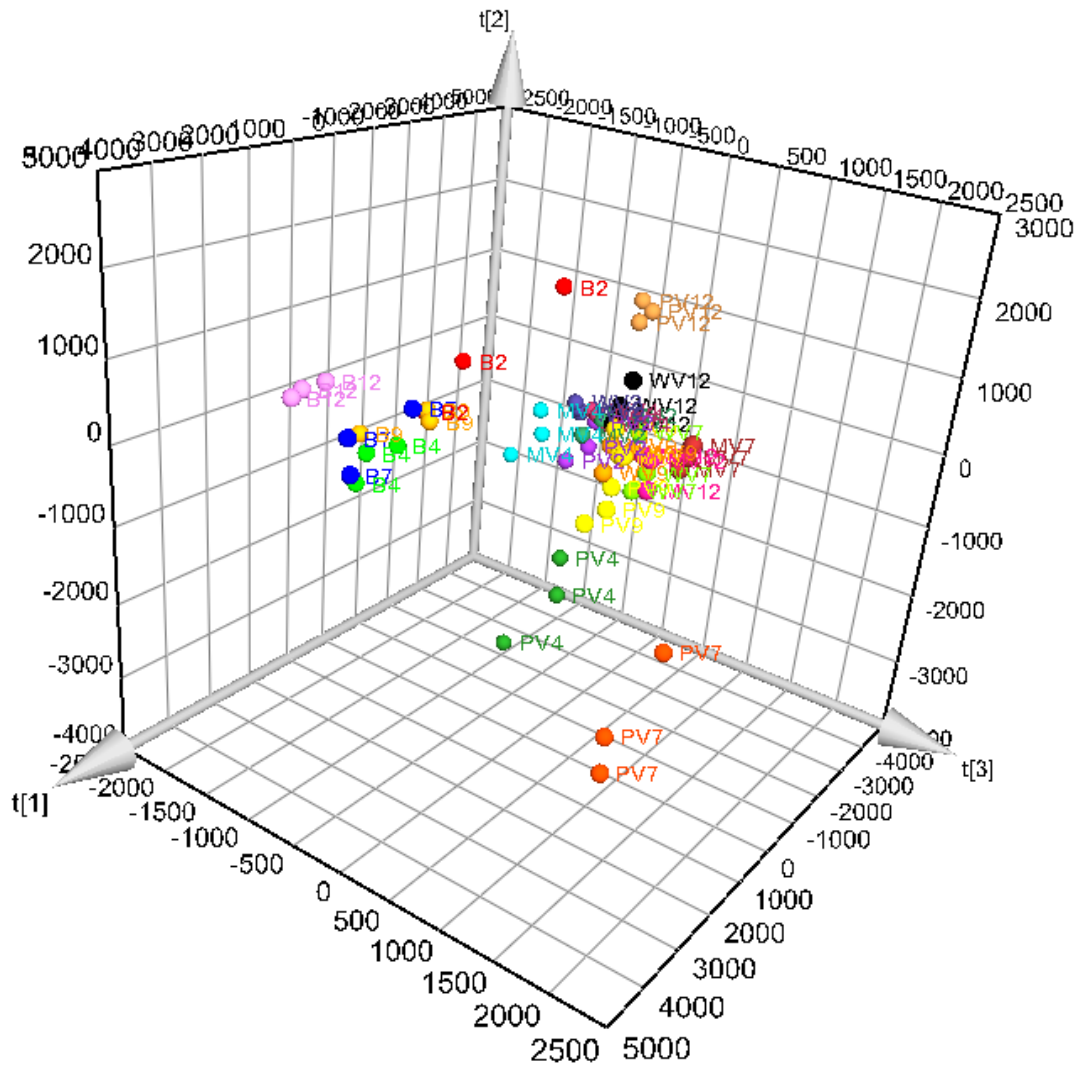

**Figure S5.** First three principal components to positive data: PC1 (31.9%), PC2 (11.7%), and PC3 (10.8%).



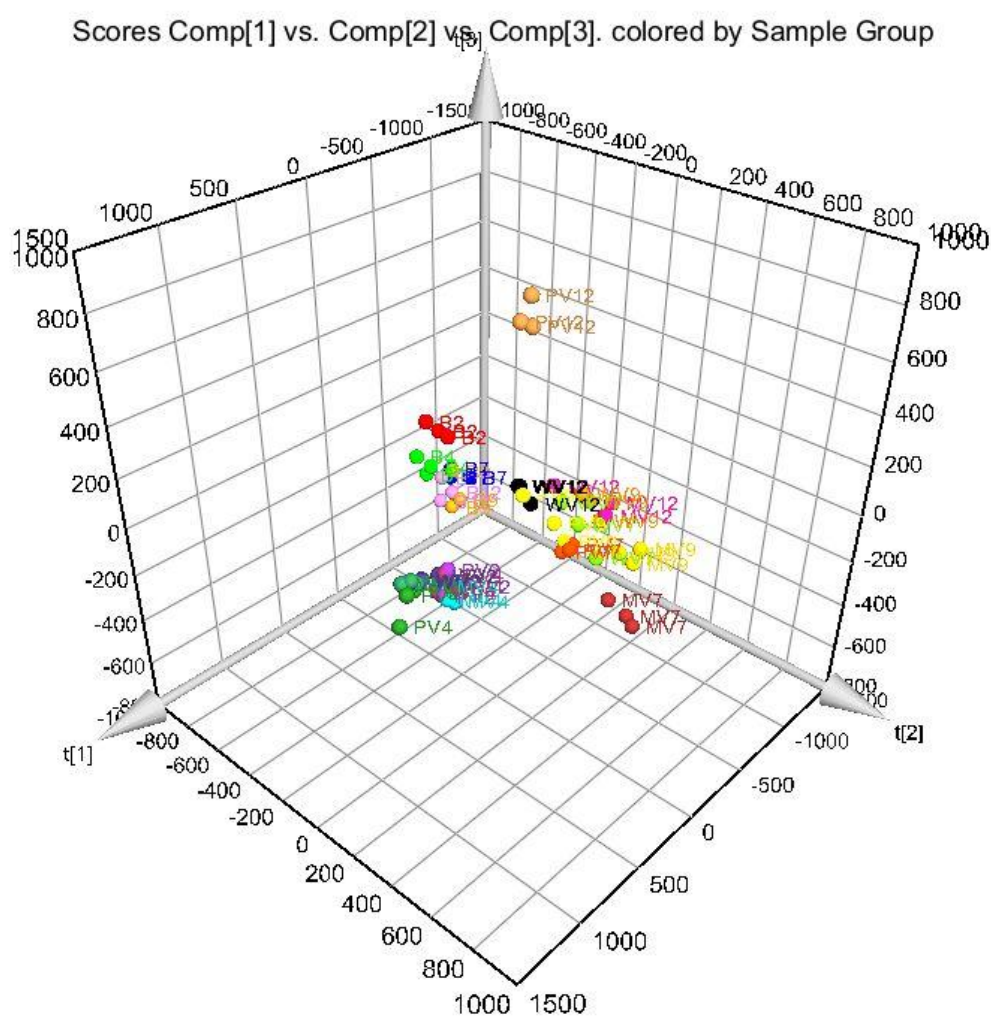

**Figure S7.** First three principal components to negative data: PC1 (32.8%), PC2 (14.2%), and PC3 (9.4%).







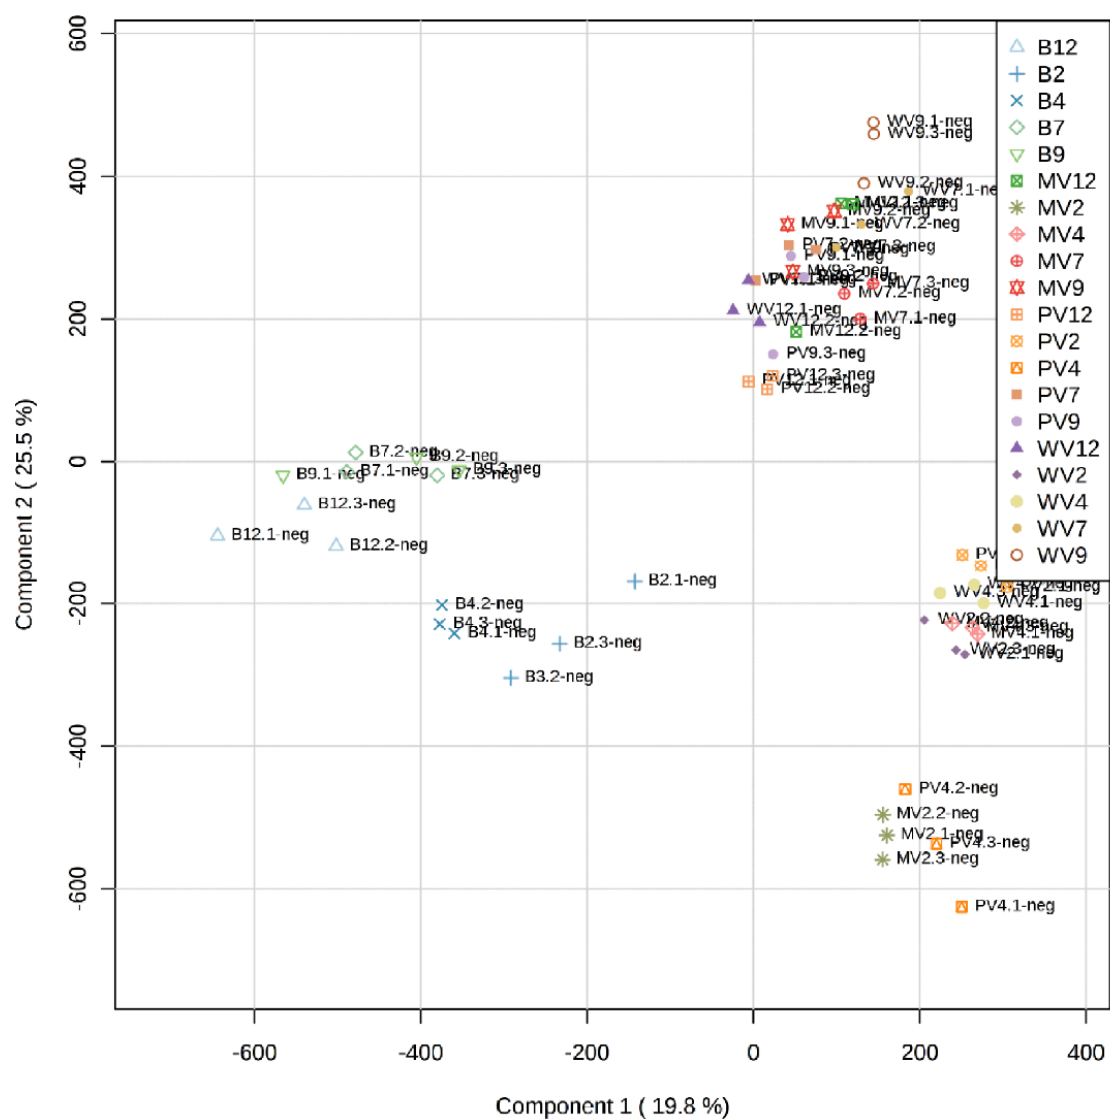

**Figure S9.** PLS-DA analysis of samples obtained in negative mode.

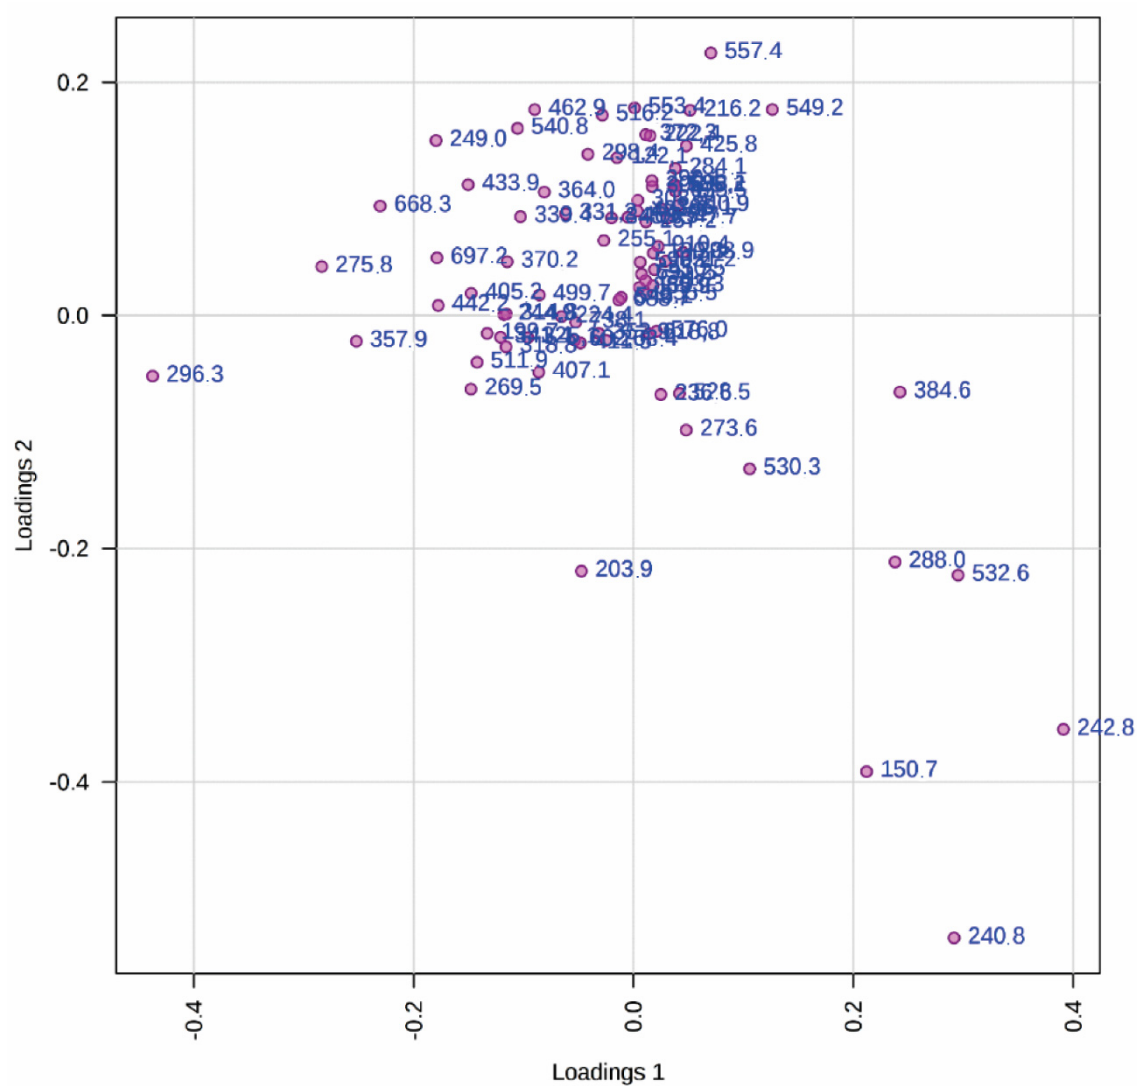

**Figure S10.** PLS-DA loadings for samples obtained in negative mode.

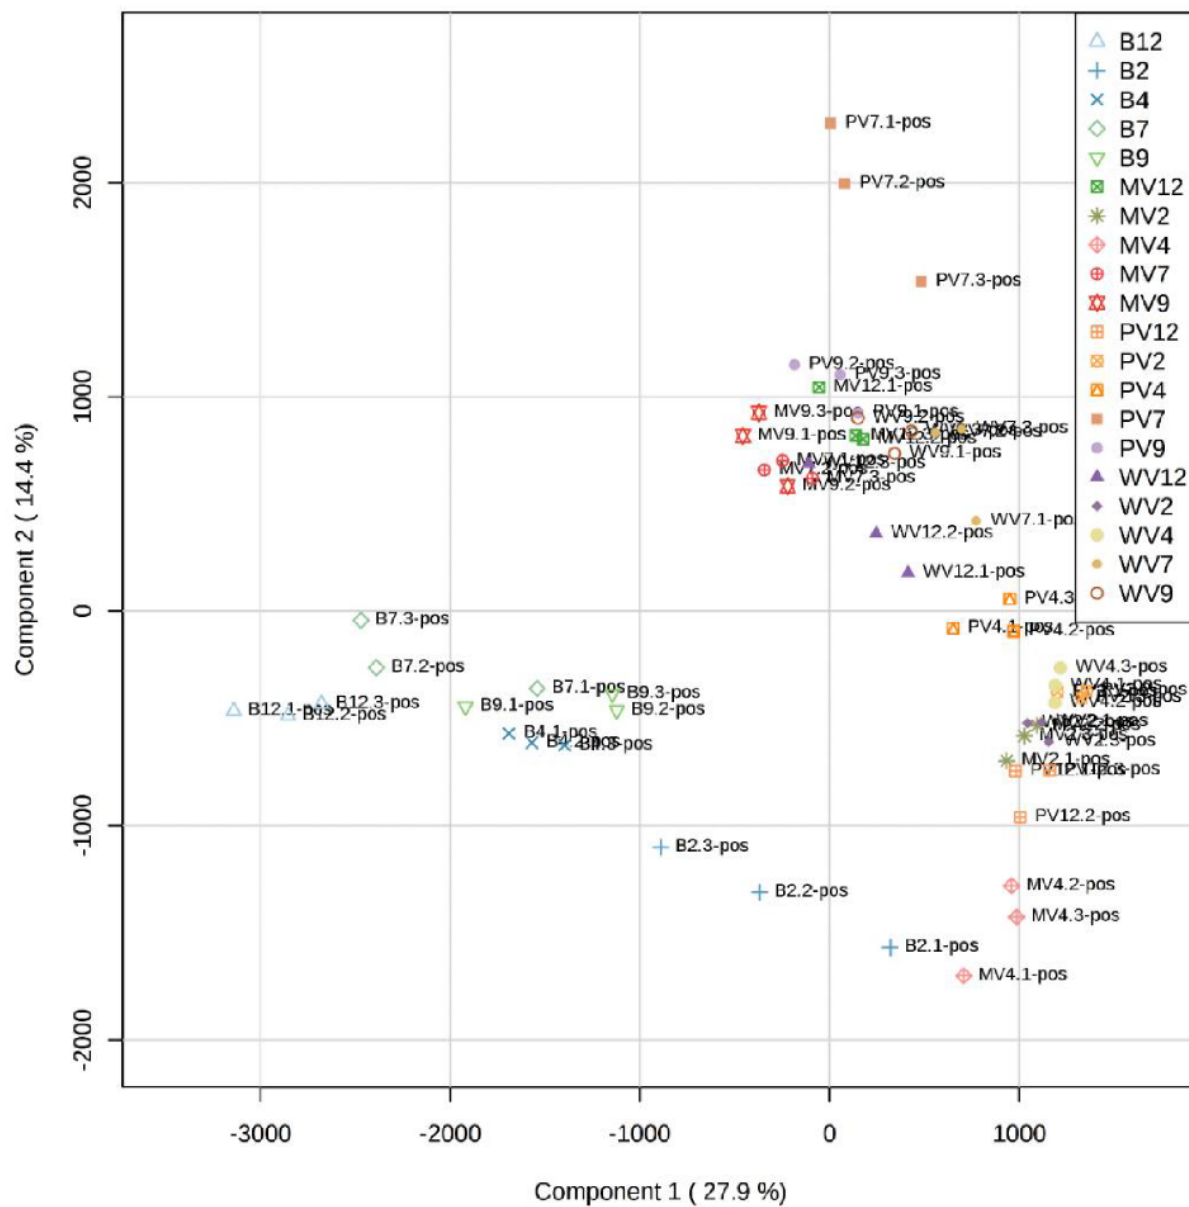

**Figure S11.** PLS-DA analysis of samples obtained in positive mode.

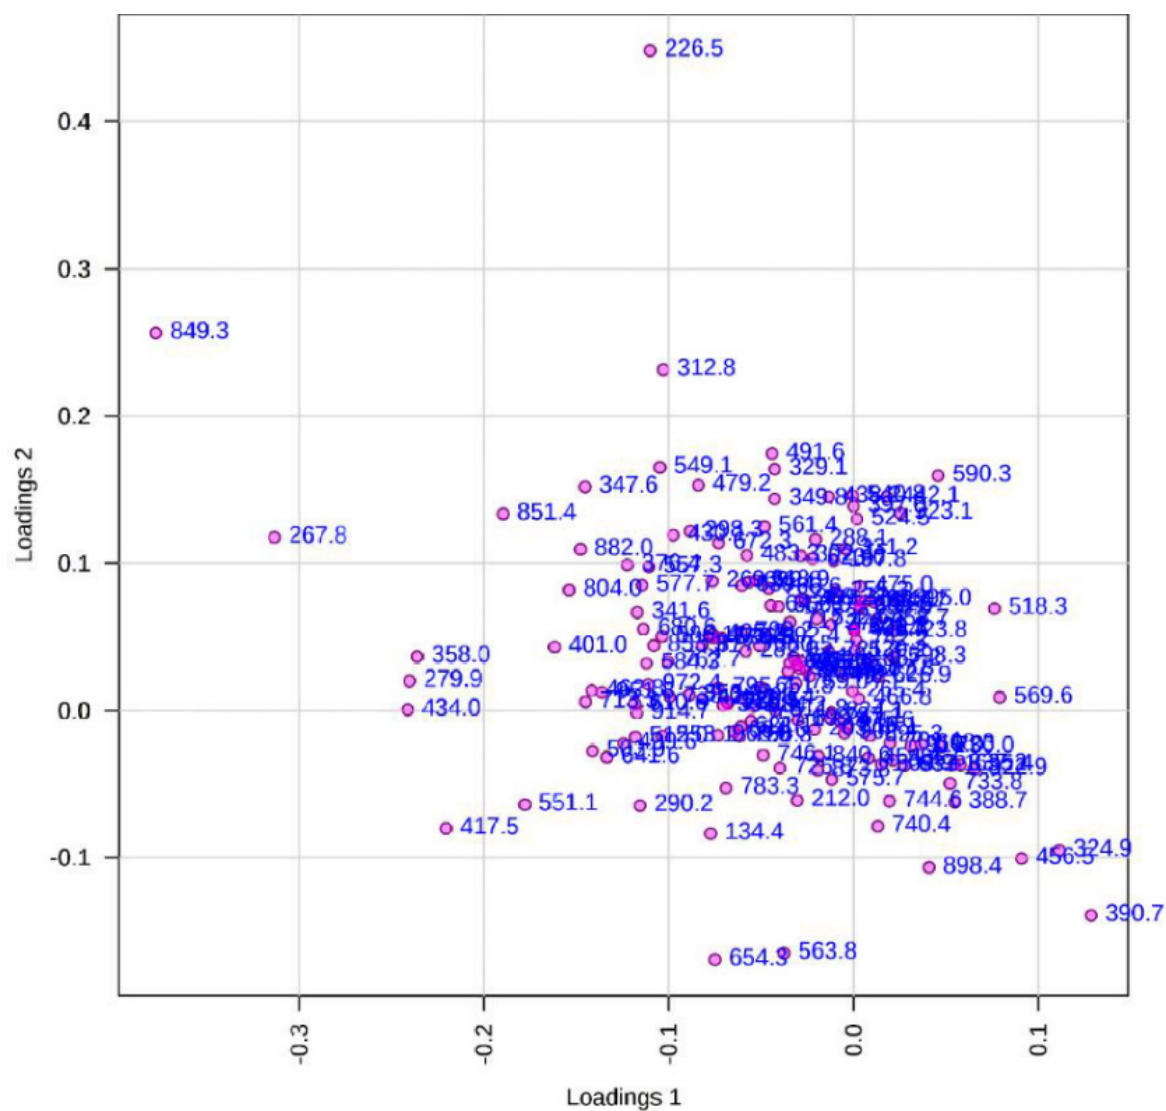

**Figure S12.** PLS-DA loadings for samples obtained in positive mode.

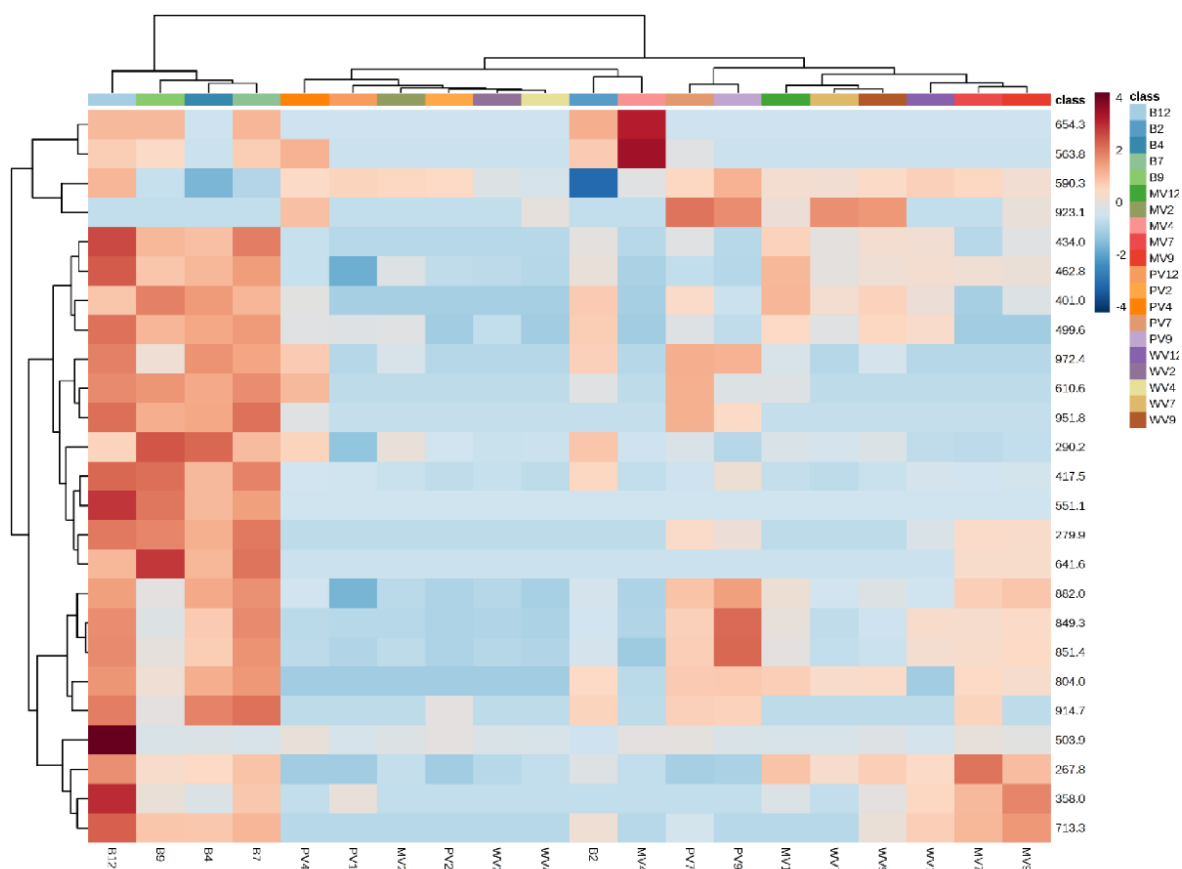

**Figure S13.** Heatmap for samples obtained in positive mode. The rows represent the top 25 VIP ions defined by PLS-DA. The columns refer to the means of normalized sample intensity. The greater the intensity for a detected ion, the redder the tone. In contrast, the smaller the intensity, the bluer the tone.

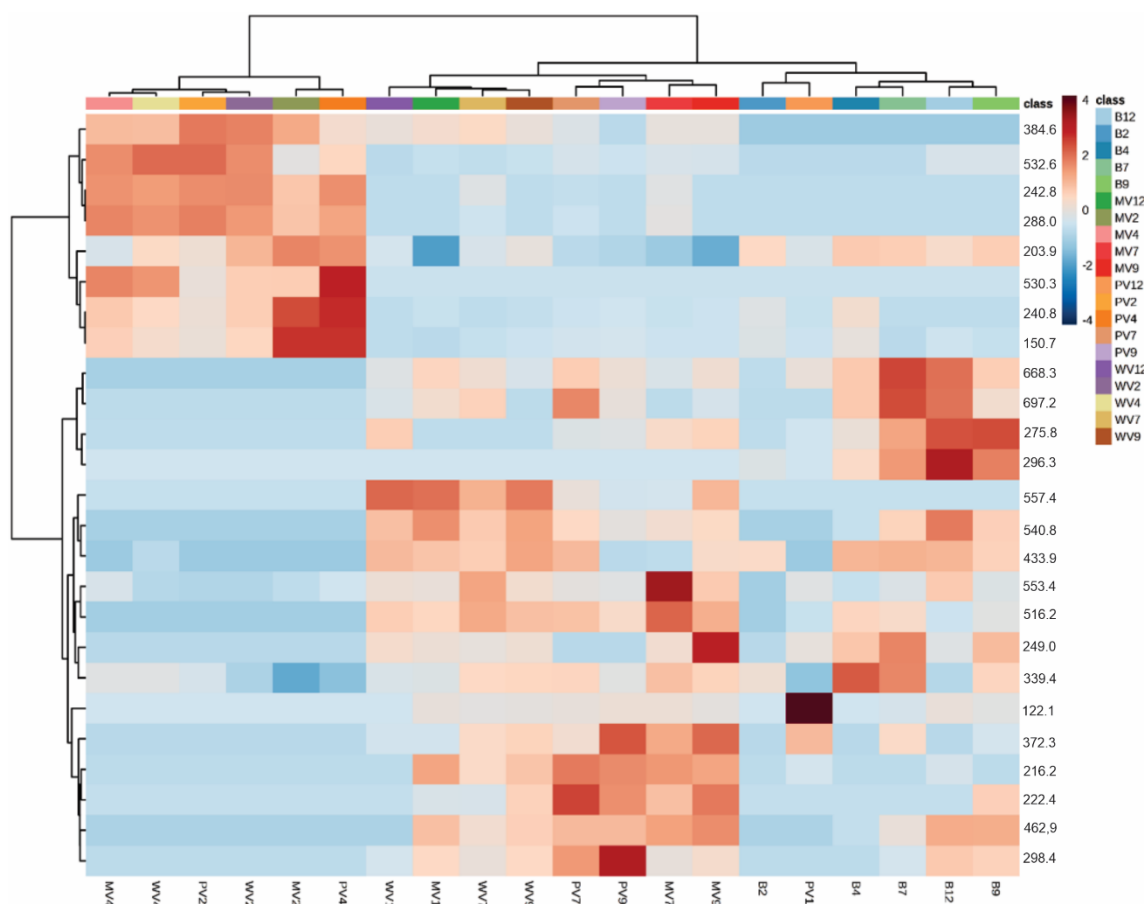

**Figure S14.** Heatmap for samples obtained in negative mode. The rows represent the top 25 VIP ions defined by PLS-DA. The columns refer to the means of normalized sample intensity. The greater the intensity for a detected ion, the redder the tone. In contrast, the smaller the intensity, the bluer the tone.

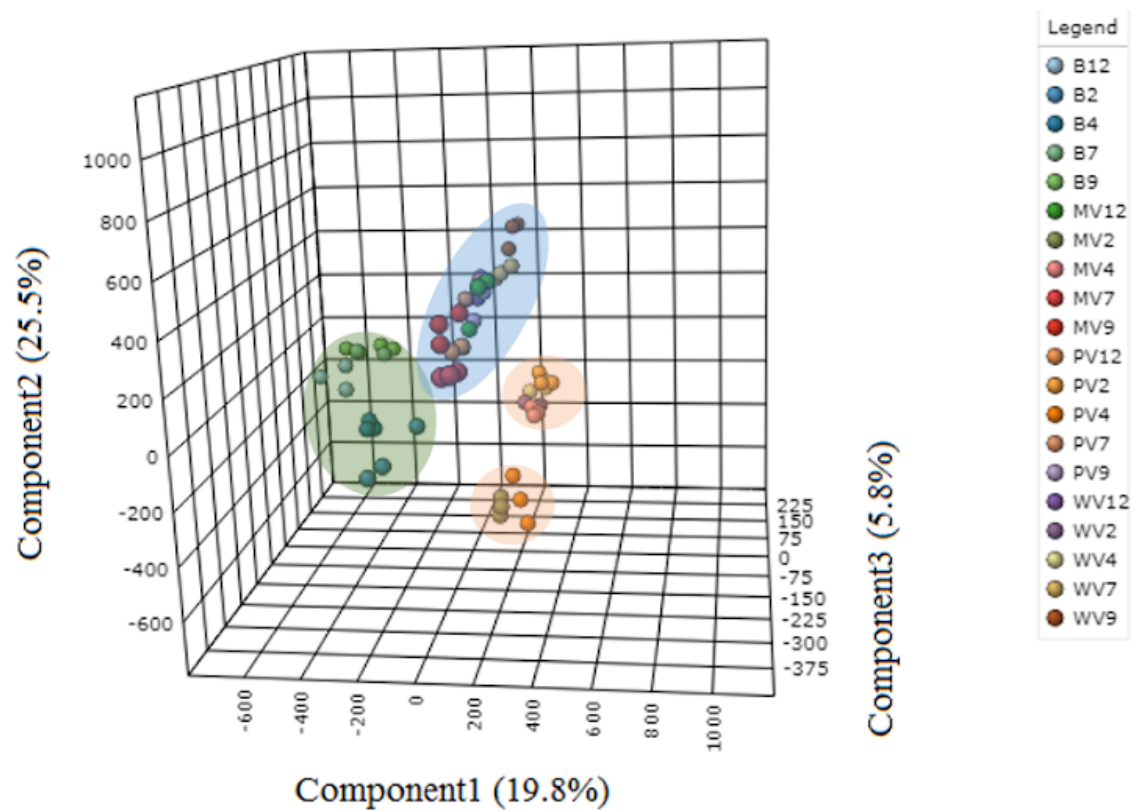

**Figure S15.** PLS-DA analysis of negative-mode data.





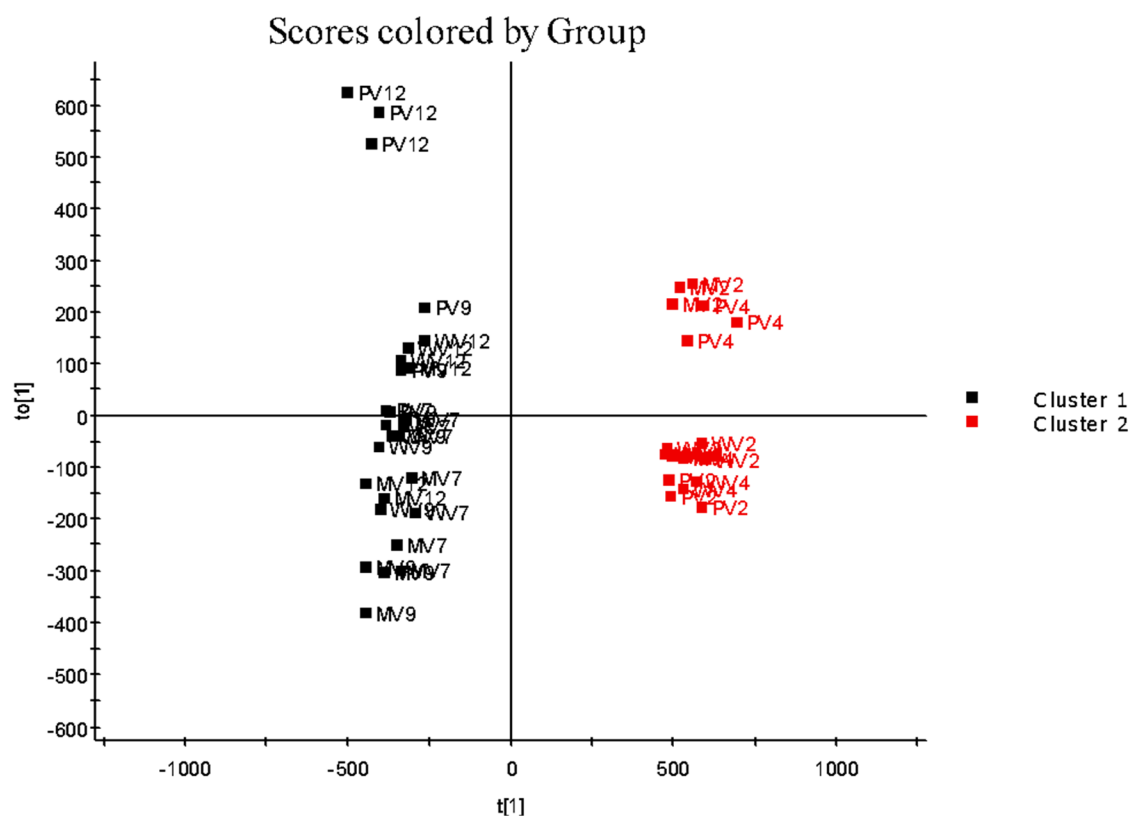

**Figure S17.** OPLS-DA analysis of negative-mode data.
